# Supplementary material
Source: PubMed Central journal article supplement (PMC7259522)
Supplement: jciinsight-5-133365-s102.pdf [file jciinsight-5-133365-s102.pdf]

## **Supplementary materials**

### **Comet assay**

The generation of DNA strand breaks was assessed by single cell gel electrophoresis (Comet) assay (1), using a Fpg-FLARE (Fragment length analysis using repair enzymes) comet kit in accordance with the manufacturer's instructions (Trevigen, Cat # 4250-050-K, Gaithersburg, MD). For each experimental points at least three different mice were analyzed, and 50 cells were evaluated from each experiment. Comet tail length and tail moment were measured under a fluorescence microscope (Zeiss AXIO Imager 72) using an automated image analysis system based on a public domain NIH Image Program.

### **Flow cytometry analysis for DDR signatures and phosphorylated p65**

DDR signature and phosphorylated p65 staining were performed after fixation and permeabilization using Cytofix/Cytoperm buffer (BD Pharmingen, Cat # 554722, San Jose, CA) and washed using Perm/Wash Buffer (BD Pharmingen, Cat # 554723, San Jose, CA). Cells were then incubated with antibodies against p53-S15 (Cell Signaling Tech, Cat # 9284, Danvers, MA), ATM-S1981 (BioLegend, Cat # 651204, San Diego, CA), and CHK2-T68 (eBioscience, Cat # 12-9508-41, Waltham, MA), or phosphor-p65 (Ser536) (ref. 2, 3, Cell Signaling Tech, Cat # 5733S, Danvers, MA), respectively.

## Supplementary references

1. Li X, Sipple J, Pang Q, Du W. Salidroside stimulates DNA repair enzyme Parp-1 activity in mouse HSC maintenance. *Blood*. 2012;119(18):4162-4173.
2. Maguire O, O'Loughlin K, Minderman H. Simultaneous assessment of NF- $\kappa$ B/p65 phosphorylation and nuclear localization using imaging flow cytometry. *J Immunol. Methods*. 2015;423:3-11.
3. Kwon HJ, et al. Stepwise phosphorylation of p65 promotes NF- $\kappa$ B activation and NK cell responses during target cell recognition. *Nat Commun*. 2016;7:11686.

## Supplementary Table

**Table S1. Primers used for qPCR analysis**

| Gene                          | Forward                    | Reverse                        |
|-------------------------------|----------------------------|--------------------------------|
| <i>Nlrp12</i>                 | TGATGAACAGGATCTTGGGA       | TGGAAACTCAGGTGGATGAA           |
| <i>IL-1<math>\beta</math></i> | CCTTCCAGGATGAGGACATGA      | TGAGTCACAGAGGATGGGCTC          |
| <i>IL-6</i>                   | GAGGATACCACTCCCAACAGACC    | AAGTGCATCATCGTTGTTTCATACA      |
| <i>Eya2</i>                   | TCGGGACGACTCTGCACTGT       | GCTGTACTGTGTCTGGCCATAGG        |
| <i>Gapdh</i>                  | TCAATGAAGGGGTCGTTGAT       | CGTCCCGTAGACAAAATGGT           |
| <i>NLRP12</i>                 | CAGGCATGATGCTGCTTTGCGA     | AGCACAGAAGCCATCTCCTGAC         |
| <i>FANCA</i>                  | CCA AGG CCA TGT CCG ACT CG | CAG AAA GCA TGG CCC TGG CGA CG |
| <i>GAPDH</i>                  | GTCTCCTCTGACTTCAACAGCG     | ACCACCCTGTTGCTGTAGCCAA         |

## Supplementary figures

Fig S1

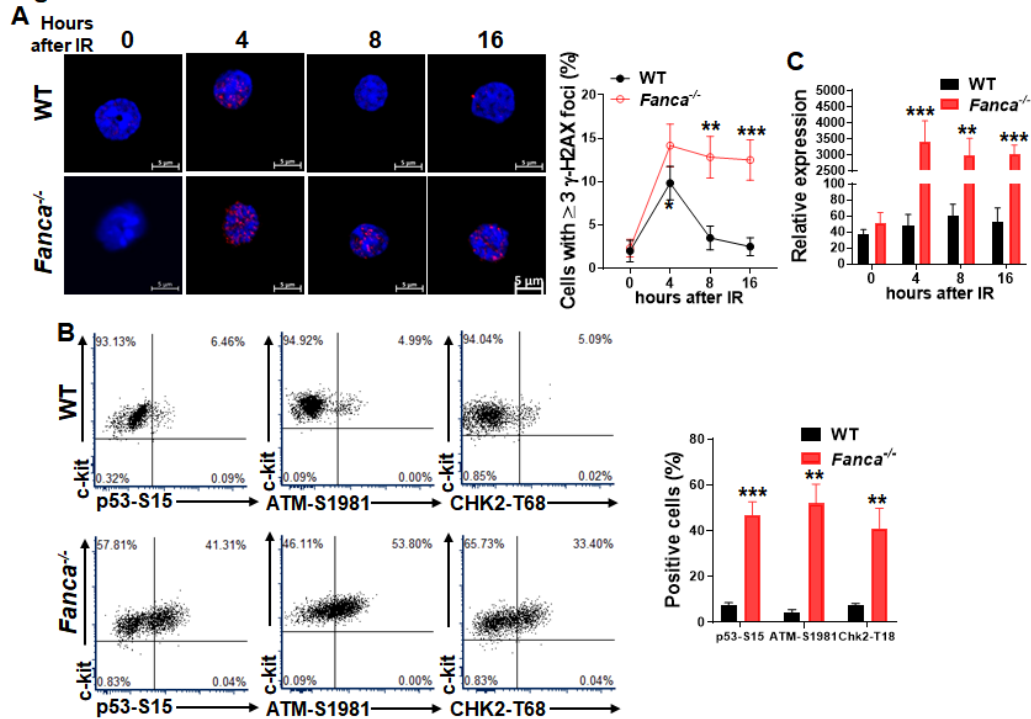

**Fig S1. Persistent DNA damage induces *Nlrp12* upregulation in *Fanca*<sup>-/-</sup> HSCs. (A)**

Persistent DNA damage-induced by ironizing radiation (IR) in *Fanca*<sup>-/-</sup> HSCs. *Fanca*<sup>-/-</sup> mice and their wild-type (WT) littermates were irradiated with 500 cGy of TBI. Bone marrow (BM) SLAM (Lin<sup>-</sup>Sca1<sup>+</sup>c-kit<sup>+</sup>CD150<sup>+</sup>CD48<sup>+</sup>) cells were isolated at the indicated timepoints post-IR and subjected to immunofluorescence staining for  $\gamma$ -H2AX. Representative images (Left) and quantification (Right) of  $\gamma$ -H2AX foci forming kinetics are shown. 0h, untreated control (n=6 per group). (B) IR-induced activation of DNA damage response (DDR) in *Fanca*<sup>-/-</sup> HSCs. *Fanca*<sup>-/-</sup> mice and their WT littermates were irradiated with 500 cGy of TBI. BM SLAM cells were isolated at the indicated timepoints post-IR and subjected to flow cytometry analysis for phosphorylation of ATM-S1981, CHK2-T68 and p53-S15. Representative flow plots at 8 hours post-IR (Left) and

quantifications of DDR kinetics (Right) are shown (n=6 per group). (C) Persistent DNA damage-induced *Nlrp12* expression in *Fanca*<sup>-/-</sup> HSCs upon IR. *Fanca*<sup>-/-</sup> mice and their WT littermates were irradiated with 500 cGy of TBI. BM SLAM cells were isolated at the indicated timepoints post-IR and subjected to qPCR analysis for *Nlrp12* expression using primers listed in Table S1. Samples were normalized to the level of *GAPDH* mRNA (n=6 per group).

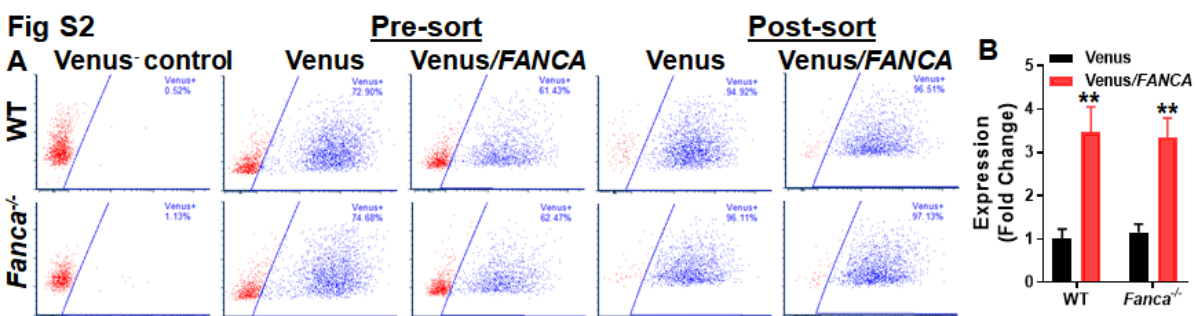

**Fig S2. Transduction efficiency and FACS of lentiviral vector expressing Venus and *FANCA*.** Bone marrow (BM) LSK (*Lin*<sup>-</sup>*Sca1*<sup>+</sup>*c-kit*<sup>+</sup>) cells from *Fanca*<sup>-/-</sup> mice and their WT littermates were transduced with lentiviral vector expressing Venus or Venus/*FANCA*. (A) Representative flow plots of pre- and post-cell sort are shown. (B) The transduced cells in (A) were subjected to qPCR analysis for *FANCA* expression using primers listed in Table S1. Samples were normalized to the level of *GAPDH* mRNA.

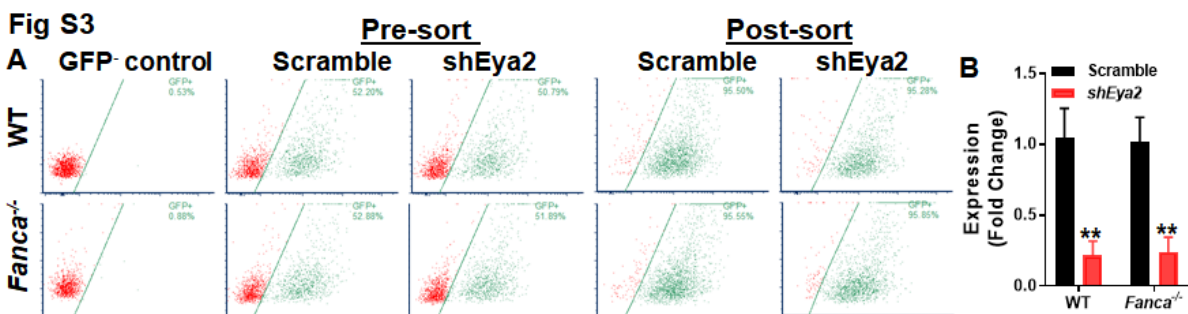

**Fig S3. Transduction efficiency and FACS of lentiviral vector expressing Scramble shRNA or shRNA targeting *Eya2*.** BM LSK (Lin<sup>-</sup>Sca1<sup>+</sup>c-kit<sup>+</sup>) cells from WT mice were transduced with lentiviral vector expression Scramble shRNA or shRNA targeting *Eya2*. (A) Representative flow plots of pre- and post-cell sort are shown. (B) The transduced cells in (A) were subjected to qPCR analysis for *Eya2* expression using primers listed in Table S1. Samples were normalized to the level of *GAPDH* mRNA.

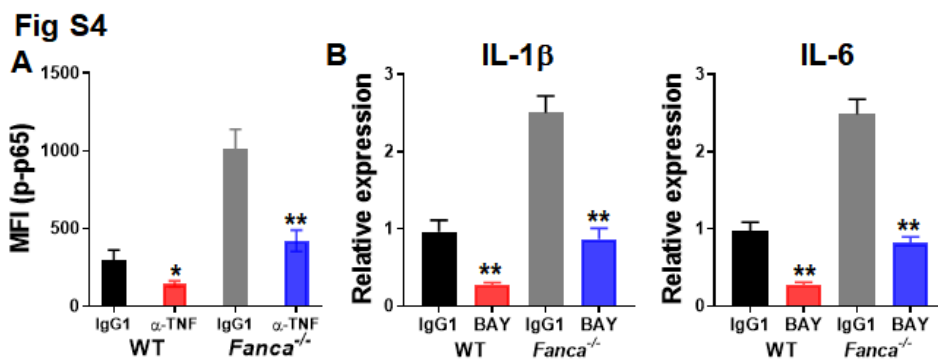

**Fig S4. TNF neutralization or NF-κB inhibition suppresses downstream signaling.** (A) Inhibition of NF-κB activation by anti-TNF $\alpha$  neutralizing antibody. WBMCs from mice treated with anti-TNF $\alpha$  neutralizing antibody or IgG1 control, as described in Figure 2H-I, were subjected to flow cytometry analysis for phosphorylated p65 (p-p65) in SLAM cells. (B) BAY11-7082 suppresses *IL-1β* and *IL-6* expression. RNA were extracted from WBMCs from mice injected with BAY11-7082 or IgG1 control, as described in Figure 2H-I, followed by qPCR analysis for *IL-1β* and *IL-6* expression using primers listed in Table S1.

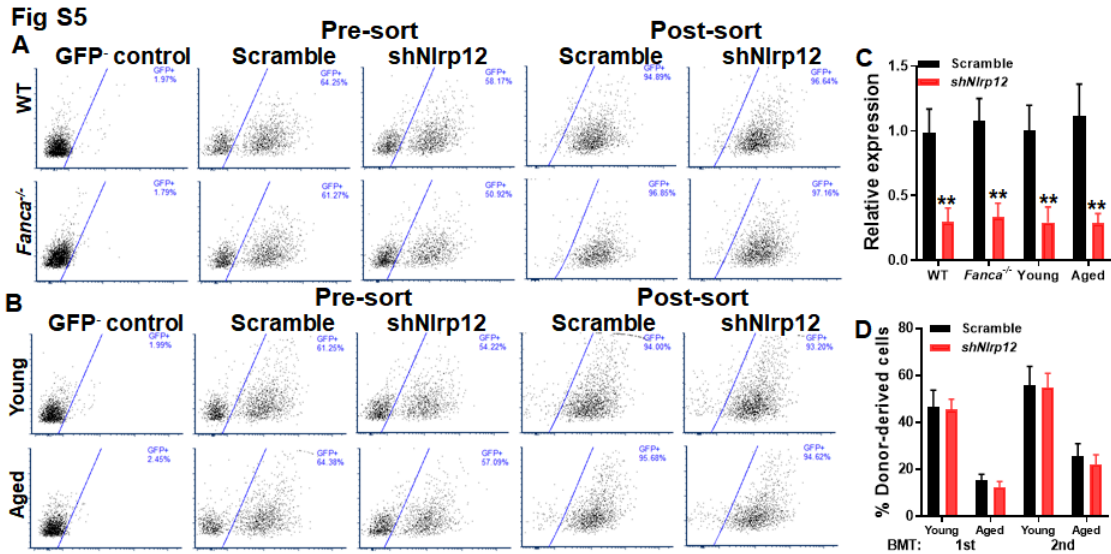

**Fig S5. Transduction efficiency and FACS of lentiviral vector expressing Scramble shRNA or shRNA targeting *Nlrp12*.** BM LSK (Lin<sup>-</sup>Sca1<sup>+</sup>c-kit<sup>+</sup>) cells from *Fanca*<sup>-/-</sup> mice and their WT littermates (A), or young and aged mice (B) were transduced with lentiviral vector expression Scramble shRNA or shRNA targeting *Nlrp12*. Representative flow plots of pre- and post-cell sort are shown. (C) The transduced cells in (A and B) were subjected to qPCR analysis for *Nlrp12* expression using primers listed in Table S1. Samples were normalized to the level of *GAPDH* mRNA. (D) Depletion of *Nlrp12* compromises HSC function in aged mice. LSK cells from young or aged mice were transduced with lentiviral vector expressing scramble shRNA or shRNA targeting *Nlrp12*. 2,000 sorted GFP<sup>+</sup> cells, along with 2X10<sup>5</sup> protector cells, were transplanted into lethally irradiated BoyJ recipients. Donor-derived chimera in primary recipients (Left) or secondary recipients (Right) were determined by flow cytometry at 16 weeks post-transplant (n=9-12).

**Fig S6**

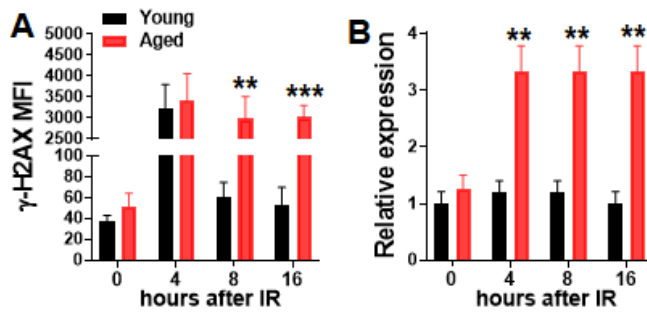

**Fig S6. IR-induced persistent DNA damage and *Nlrp12* upregulation in aged HSCs.**

(A) IR-induced persistent DNA damage in aged HSCs. Young and aged mice were irradiated with 500 cGy of TBI. BM SLAM cells were isolated at the indicated timepoints post-IR and subjected to flow cytometry analysis for  $\gamma$ -H2AX (n=6 per group). (B) Persistent DNA damage-induced *Nlrp12* expression in aged HSCs upon IR. Young and aged mice were irradiated with 500 cGy of TBI. BM SLAM cells were isolated at the indicated timepoints post-IR and subjected to qPCR analysis for *Nlrp12* expression using primers listed in Table S1. Samples were normalized to the level of *GAPDH* mRNA (n=6 per group).

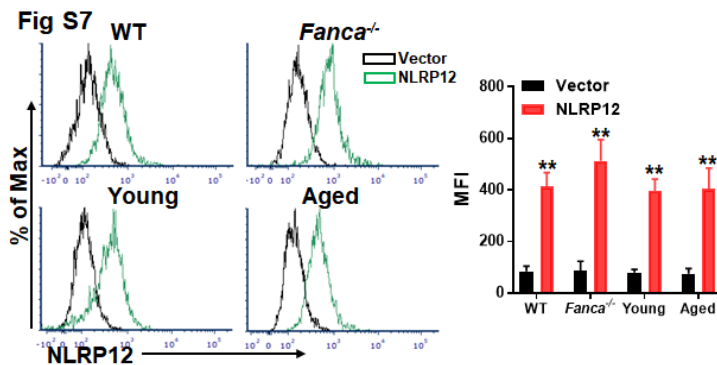

**Fig S7. Ectopic expression of *Nlrp12* in transduced cells.** BM LSK cells from *Fanca*<sup>-/-</sup> mice or their WT littermates (Upper), or young and aged mice (Lower) were transduced

with lentiviral vector expressing eGFP vector only or eGFP/Nlrp12. 2,000 GFP<sup>+</sup> sorted cells, along with 2X10<sup>5</sup> protector cells, were then transplanted into lethally irradiated BoyJ recipients. Donor-derived HSCs (GFP<sup>+</sup>CD45.2<sup>+</sup>Lin<sup>-</sup>c-kit<sup>+</sup>Sca1<sup>+</sup>CD150<sup>+</sup>CD48<sup>-</sup>) from the recipients were subjected to flow cytometry analysis for NLRP12. Representative flow plots (Left) and quantification of mean fluorescence intensity (MFI; Right) are shown (n=9).

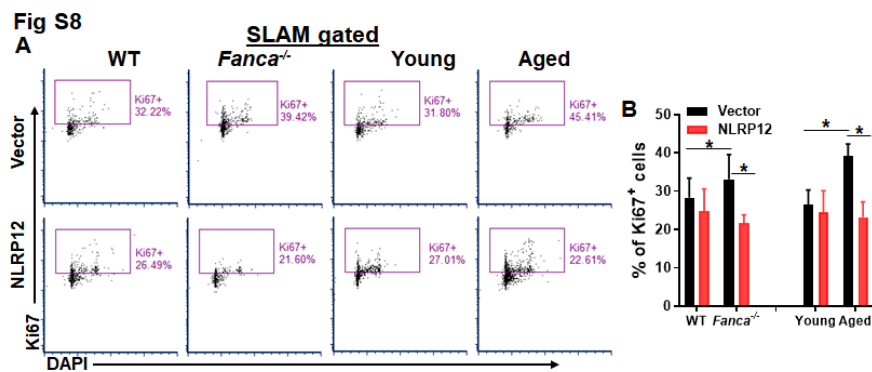

**Fig S8. NLRP12 increases quiescence of *Fanca*<sup>-/-</sup> and aged HSC.** LSK cells from WT and *Fanca*<sup>-/-</sup> mice, or young and old mice were transduced with lentiviral vector expressing eGFP-alone (Vector) or eGFP-NLRP12. 2,000 sorted cells, along with 2X10<sup>5</sup> protector cells, were transplanted into lethally irradiated BoyJ recipients. 16 weeks post-transplant, BM WBMCs were subjected to Flow cytometry analysis for cell cycle in donor-derived SLAM cells using anti-Ki67 antibody and DAPI. Representative flow plots (Left) and quantification (Right) are shown (n=9 per group).



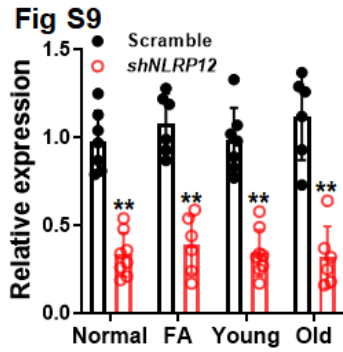

**Fig S9. NLRP12 knockdown in human samples.** BM CD34<sup>+</sup> cells from healthy donors (Normal) and FA patients; or young and aged donors were transduced with lentiviral vector expression Scramble shRNA or shRNA targeting human *NLRP12* followed by cell sorting for GFP. RNA were extracted from the sorted GFP<sup>+</sup> cells for quantitative RT-PCR analysis using primers listed in Table S1. Levels of the expression in each sample were normalized to the level of *GAPDH* mRNA (n=6-8).
